# Supplementary material
Source: PubMed Central journal article supplement (PMC2846160)
Supplement: ddq019_1.pdf [file ddq019_1.pdf]

## **SUPPLEMENTAL METHOD**

### **Barrier Function Assay**

Opossums were bred and maintained at the University of Illinois, Urbana mouse facility.

All animal procedures were approved by the University of Illinois, Urbana's Animal Care and Use Committee. Dye penetration assays on opossums were performed as previously described in mice (1).

1. de Guzman Strong, C., Wertz, P.W., Wang, C., Yang, F., Meltzer, P.S., Andl, T., Millar, S.E., Ho, I.C., Pai, S.Y. and Segre, J.A. (2006) Lipid defect underlies selective skin barrier impairment of an epidermal-specific deletion of Gata-3. *J. Cell Biol.*, **175**, 661-670.

**Supplementary Table 1**

| Position/Name on EDC | UCSC Coordinates |             | Size of CNE |
|----------------------|------------------|-------------|-------------|
|                      | Beginning        | End         |             |
| 2                    | 150,223,484      | 150,223,754 | 270         |
| 3                    | 150,224,212      | 150,224,384 | 172         |
| 9                    | 150,231,146      | 150,231,790 | 644         |
| 18                   | 150,240,740      | 150,241,236 | 496         |
| 49                   | 150,270,919      | 150,271,046 | 127         |
| 122                  | 150,344,161      | 150,344,569 | 408         |
| 132                  | 150,354,421      | 150,355,824 | 1,403       |
| 136                  | 150,358,367      | 150,358,482 | 115         |
| 139                  | 150,361,533      | 150,361,782 | 249         |
| 145                  | 150,367,081      | 150,367,582 | 501         |
| 180                  | 150,402,310      | 150,403,002 | 692         |
| 184                  | 150,407,000      | 150,407,429 | 429         |
| 185                  | 150,407,932      | 150,408,136 | 204         |
| 189                  | 150,411,850      | 150,412,078 | 228         |
| 199                  | 150,420,493      | 150,420,708 | 215         |
| 342                  | 150,564,100      | 150,564,694 | 594         |
| 346                  | 150,568,287      | 150,568,542 | 255         |
| 409                  | 150,631,961      | 150,632,622 | 661         |
| 430                  | 150,652,291      | 150,652,619 | 328         |
| 461                  | 150,683,210      | 150,683,588 | 378         |
| 531                  | 150,753,354      | 150,753,714 | 360         |
| 534                  | 150,756,606      | 150,756,846 | 240         |
| 537                  | 150,759,864      | 150,760,135 | 271         |
| 542                  | 150,764,576      | 150,764,798 | 222         |
| 555                  | 150,777,079      | 150,777,205 | 126         |
| 559                  | 150,781,626      | 150,781,965 | 339         |
| 576                  | 150,797,668      | 150,797,910 | 242         |
| 621                  | 150,843,202      | 150,843,535 | 333         |
| 639                  | 150,861,064      | 150,861,488 | 424         |
| 642                  | 150,865,005      | 150,865,380 | 375         |
| 661                  | 150,883,425      | 150,884,534 | 1,109       |
| 673                  | 150,895,340      | 150,895,715 | 375         |
| 754                  | 150,976,553      | 150,977,133 | 580         |
| 761                  | 150,983,327      | 150,984,045 | 718         |
| 877                  | 151,099,712      | 151,100,212 | 500         |
| 923                  | 151,145,042      | 151,145,699 | 657         |
| 964                  | 151,185,995      | 151,186,382 | 387         |
| 978                  | 151,199,941      | 151,200,157 | 216         |

|      |             |             |     |
|------|-------------|-------------|-----|
| 984  | 151,206,141 | 151,206,503 | 362 |
| 1040 | 151,262,915 | 151,263,751 | 836 |
| 1226 | 151,448,012 | 151,448,260 | 248 |
| 1229 | 151,451,465 | 151,451,896 | 431 |
| 1234 | 151,455,875 | 151,456,726 | 851 |
| 1235 | 151,457,138 | 151,457,680 | 542 |
| 1275 | 151,497,219 | 151,497,516 | 297 |
| 1403 | 151,625,619 | 151,625,748 | 129 |
| 1413 | 151,635,685 | 151,635,943 | 258 |
| 1416 | 151,638,137 | 151,638,457 | 320 |

**Supplementary Table 1. UCSC coordinates (hg18:chr1) of Epidermal**

**Differentiation Complex Conserved Noncoding Elements defined by**

**MultiPipMaker.** Position on EDC reflects distance (kb) away from the *S100A10* transcriptional start site.

Supplementary Table 2

| PCR           | Forward Primer          | Reverse Primer              |
|---------------|-------------------------|-----------------------------|
| S100a10       | CTGAGAGTGCTCATGGAACG    | TCCCCTTCTGCTTCATGTTT        |
| S100a11       | CCACCGTCAGCCACAGTC      | ATCTAGCTGCCCCGTCACAGT       |
| Tchhl1        | CACATTGCCCCACATTCC      | CCCTCAAGGAGCTGTCTCAG        |
| Rptn          | CCTGCCTCTTCTGCTCATTC    | CCGAAGGATGTCTCCAAACT        |
| Horn          | GCAAGCAACATCAGTCTCCA    | CAGAATTTGGTGAAACTCTGTTACC   |
| Flg           | CTCCTTCAGCTGCATTCGAT    | TGCCTGTAGTTGTCCTTCCA        |
| Flg2          | TGCGTCAGGCCTTATCCTAC    | TCCTTCTCCAGCAGTTCTT         |
| Crnn          | AACAGAAACTTGTCCTCCTG    | TGACGTCAGCAAACCTCATGTT      |
| Gm 4858       | CTCAAGCATTCCACTCTCTGG   | CCCCCAAATTCAGTGTAATG        |
| Lce1m         | GCTGAGTGATCTACTCCAGTGC  | GAGAGAGAATCGGGGCTTGT        |
| Crc1          | TTCTGCCTAGCAGGTGTCAA    | AGCAAGAGGAGGAGGAGGAC        |
| Lce3f         | GCCTTCTTCTCCTACCTTTGC   | CCAGAGCTTGTAGCACAGCA        |
| Lce3c         | TCTTCTCCTGCCTTTGCTGT    | TGCTGATTCTCCAGACTGT         |
| Lce3b         | AGCATCCTCAGACACGGACT    | TGTAGCACAGCAGGAAGAGG        |
| Lce3a         | AAGTCTCCTATCACCTTCCCATC | AGCTTGTAGCACAGCACGAA        |
| Lce1l         | AGTTTCAGGCCCTGCTTCTT    | CCAGGCTACAGCAGGAAGAC        |
| Kprp          | GCTCAGGTCCCAATCCAGTA    | CCTTGGTCTCCACAACCACT        |
| Lce1i         | CAGATCTTGTGCTACCCTTCA   | AATGGGCATTGTCGTTTCAT        |
| Lce1h         | TCCATTCACTGGCTGACTGA    | TCCTGCACCATTTGTTTGAA        |
| Lce1g         | CACTGGCTGAGATACCCACA    | CCACTGCTACAGCATCCAGA        |
| Lce1f         | ATCCACGCCATTAACACTGA    | CCAGGCTACAGCAGGAAGAC        |
| Lce1e         | CCACTCACTGGGTGAGATACC   | AACCCAAGCTACAGCAGGAA        |
| Lce1d         | ACTTCTCCTGAGGCGTCCAC    | CCAGGCTACAGCAGGAAGAC        |
| Lce1c         | ACTGGCTGAGAAACCCACAG    | CCAGGCTACAGCAGGAAGAC        |
| Lce1a2        | GCCCAAGGATCTTGTACTGC    | CCAGGCTACAGCAGGAAGAC        |
| Lce1b         | TCCTCCTGAAGTGGCTACAGA   | CCAGGCTACAGCAGGAAGAC        |
| Lce1a1        | CTCACCTTCCGAGGTATCCA    | AAGACACAGGGGGACACTTG        |
| Smcp          | TCTGCTGAAACATCCAGGAA    | GGATTTGGGACAGCAAGGT         |
| Ivl           | GCCTTCTCCCTCCTGTGAGT    | ATGTTTGGGAAAGCCCTTCT        |
| Spr2b         | TTCCTGGTACTCAAGCATTGG   | CTTGGGTGGACACTTCTGCT        |
| Prr9          | TCCACATCCTTCATTGAATCTC  | TTGGCTTAACTCCTGGCACT        |
| Pglyrp3       | TTGGCTTCTTGGCTCTCAGT    | CAATGTCACACCAGCCTTTG        |
| 9130204L05Rik | ACACTCTGGGTGGCTCTTCTC   | TTGGAAATTCATTCTCACCAA       |
| Pglyrp4       | ATGCTGTCTGGCTTCTTGT     | TCAGCTTAGAGCTGCAACCA        |
| S100a9        | GAAGGAAGGACACCCTGACA    | TCAACTTTGCCATCAGCATC        |
| S100a8        | CTGAGTGTCTCAGTTTGTGC    | GACCTGAGATATGATGACTTTATTCTG |
| S100a7a       | GGATAGTGTGCCTCGTTCA     | AGACTGCCTGTCTCCCTCT         |
| S100a6        | ATCCCCTCGACCACTCCTT     | AGATCATCCATCAGCCTTGC        |
| S100a5        | GAGAAGGCACTGACCACCAT    | CAATCTCCTGGTTCGCTGTTT       |
| S100a4        | CCCAAACCTCTCTATTAGCA    | CTTTTCCCCAGGAAGCTAGG        |
| S100a3b       | AGCGTCTCCCTAGGTGCTG     | GTCACACTCCCGAACTCAC         |
| S100a3a       | AGGGACACCCAGTTGGTAGG    | GCAGCTCCTTCTGCAACAAC        |
| S100a16b      | GTGTCCAGAGGCCAGAGT      | CGTCAGCATGTGGTTCAACT        |
| S100a16a      | GAGGAGGTGGACTCACAGGA    | TCCAGGTTCTGGATGAGCTT        |
| S100a14       | GGCAGGCTATAGGACAGACG    | CCTCAGCTCCGAGTAACAGG        |

|                  |                         |                         |
|------------------|-------------------------|-------------------------|
| S100a13          | CCTTGCCTGGTGCTTATAAACTT | CCCTGCAAAGGTGAAGAAAG    |
| S100a1           | CAGTGGCCACATTTGCAG      | TTCAGTTCTTTCTTGCTCAGCTT |
| B <sub>2</sub> m | TGGTGCTTGTCTCACTGACC    | CCGTTCTTCAGCATTTGGAT    |

**Supplementary Table 2. Real-time Primers for Mouse Epidermal Differentiation**

**Complex genes.**

**Supplementary Table 3**

| DNase<br>Region | Forward                  | Reverse                |
|-----------------|--------------------------|------------------------|
| neg             | CTTCTTGCATCTGTGGTGGA     | ACCCTGCTGCCATATTGTGT   |
| h923-1          | GGCATGGCTATTCAAGATGAG    | CTAAGGATGCACTGGCTATTTC |
| h923-2          | GCTCAAATAGGTTGCCTCACTC   | GGGAGAGGTTCTTTCCTGC    |
| h923-3          | GGTGGGGGTTGGACAGTTA      | AAAGCTAGGGTGTGGGAAAGA  |
| h923-4          | CCCTAGAATGTTGAGGTTTCC    | AGTCAGTCTGGGGCAGCA     |
| h923-5          | GATACTGAGCCCCTGCTAACC    | CAGTGCTATCCCCTCCTCAT   |
| h923-6          | CCCAGAAAATGGCACAGT       | CTGATTCCCATAGTTTTCTG   |
| h621-1          | GAGTCATTGATGCTTTCTGAGATT | CAGCTGCCAGTGGGTAAACT   |
| h621-2          | CACAGGTGCTATCTCTCCAC     | ATGAGGGACACCAGGGAGAC   |

**Supplementary Table 3. Tiling Primers for DNaseI Regions.**

Supplementary Figure 1

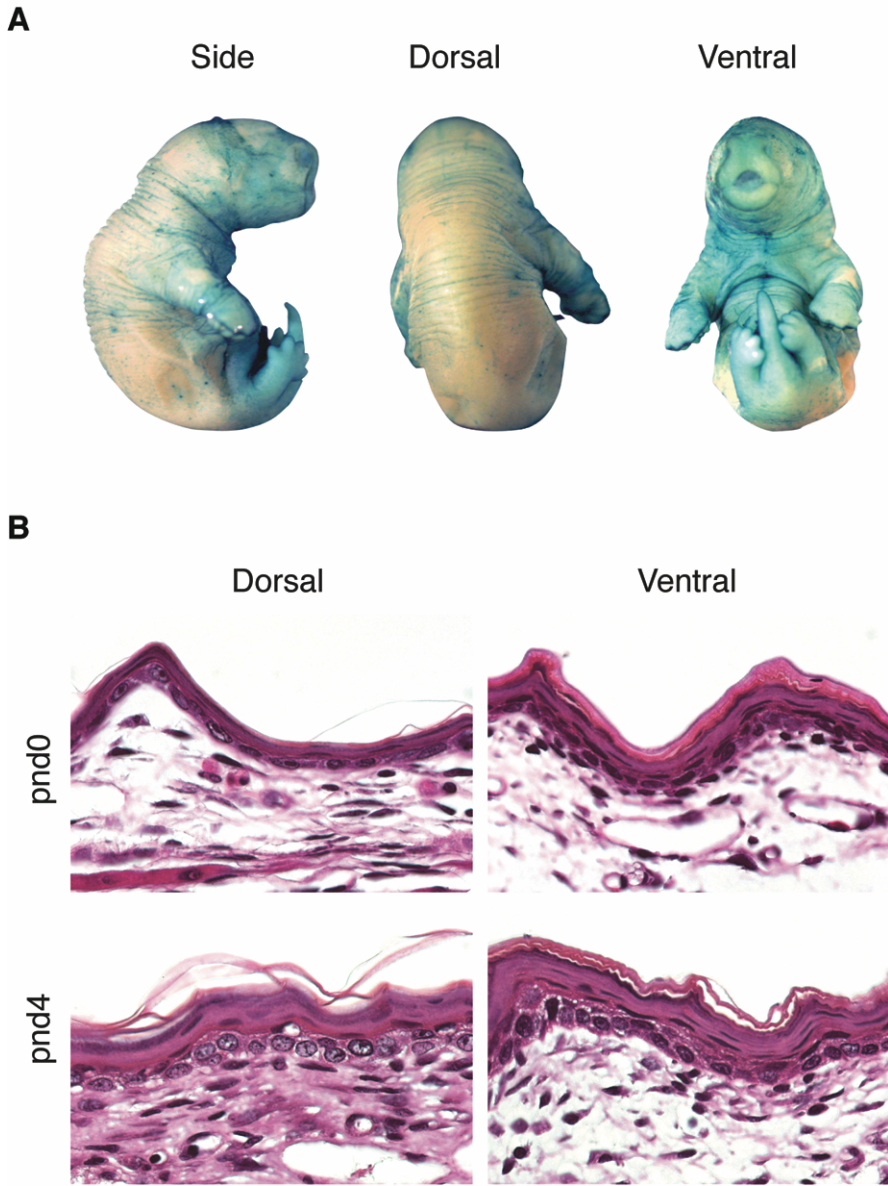

**Supplementary Figure 1. Patterning of epidermal barrier formation is conserved to the metatherian opossum. (A)** Dye exclusion assay of newborn opossum demonstrates patterning of epidermal barrier formation (dorsal to ventral migration). **(B)** Histology (dorsal and ventral) of the opossum at postnatal day (pnd) 0 (newborn) and pnd4, 40X magnification.
